# Supplementary material for: Phosphatase of regenerating liver-3 inhibits invasiveness and proliferation in non-small cell lung cancer by regulating the epithelial-mesenchymal transition
Source: PubMed Central journal article supplement (PMC5008324; doi:10.18632/oncotarget.7985), 2016-03-08
Supplement: oncotarget-07-21799-s001.pdf [file oncotarget-07-21799-s001.pdf]

## Phosphatase of regenerating liver-3 inhibits invasiveness and proliferation in non-small cell lung cancer by regulating the epithelial-mesenchymal transition

### Supplementary Materials

**Supplementary Table S1: A list of genes modulated by PRL-3 and involved in the regulation of the epithelial-to-mesenchymal transition (EMT) pathway**

| GenBank UniGene | Symbol   | Gene name                                                  | PRL3/Mock (Illumina) |
|-----------------|----------|------------------------------------------------------------|----------------------|
| Hs.360174       | SNAI2    | Snail homolog 2 (Slug)                                     | 0.07                 |
| Hs.490203       | CALD1    | Caldesmon 1                                                | 0.11                 |
| Hs.31595        | CLDN1    | Claudin-1                                                  | 0.17                 |
| Hs.82028        | TGFBR2   | TGF-beta receptor type II                                  | 0.27                 |
| Hs.511899       | EDN1     | Endothelin-1                                               | 0.43                 |
| Hs.626544       | JAG1     | Jagged1                                                    | 2.15                 |
| Hs.279594       | TNFRSF1A | Tumor necrosis factor receptor superfamily, member 1A      | 2.26                 |
| Hs.414795       | SERPINE1 | Serpin peptidase inhibitor, clade E                        | 2.44                 |
| Hs.464829       | CDH2     | N-cadherin                                                 | 2.45                 |
| Hs.1976         | PDGFB    | Platelet-derived growth factor beta polypeptide            | 2.49                 |
| Hs.461086       | CDH1     | E-cadherin                                                 | 3.06                 |
| Hs.512714       | WNT7B    | Wingless-type MMTV integration site family, member 7B      | 3.53                 |
| Hs.74615        | PDGFRA   | Platelet-derived growth factor receptor, alpha polypeptide | 4.52                 |

**Supplementary Table S2: The primer list for real-time RT-PCR**

| Symbol | Forward primer                  | Reverse primer                  |
|--------|---------------------------------|---------------------------------|
| PRL-3  | 5'-GGGCTCCAGTCCTTGTG-3'         | 5'-CGGTATTTCTCCAGGTAGG-3'       |
| SNAI2  | 5'-GGCGCCCTGAAGATGCATAT-3'      | 5'-AAGGCTTCTCCCCGTGTGA-3'       |
| CDH1   | 5'-GGCCTGAAGTGAAGTCTCGTAACGA-3' | 5'-TCAGCCGCTTTCAGATTTTCAT-3'    |
| DKK1   | 5'-TTCCGAGGAGAAATTGAGGAAAC-3'   | 5'-TGACCGGAGACAAACAGAACCTT-3'   |
| ANGPT2 | 5'-CTAACAGGAGGCTGGTGGTTTG-3'    | 5'-TCATCATGGTTGTGGCCTTGA-3'     |
| AKAP12 | 5'-GACCATCACCATCACAGTTGGA-3'    | 5'-CTGTTTCGATTATTTTCGGGTGTCT-3' |
| TBP    | 5'-CACGAACCACGGGACTGATT-3'      | 5'-TTTTCTTGCTGCCAGTCTGGAC-3'    |

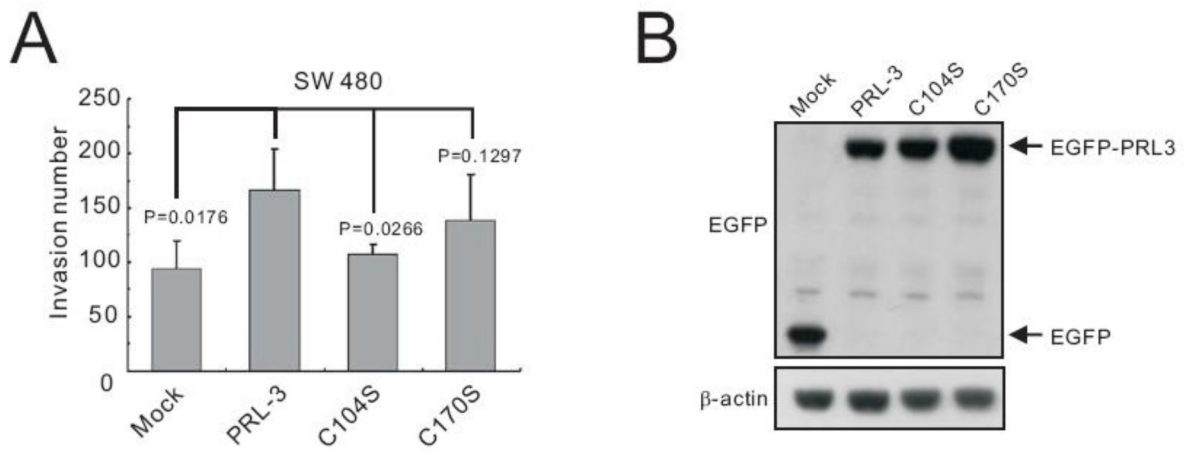

**Supplementary Figure S1: Promotion of invasiveness in colon cancer cell line by PRL-3 overexpression.** (A) Invasiveness ability of transient expression of wild-type PRL-3 and mutant PRL-3/C104S and PRL-3/C170S, as determined by Matrigel-coated transfilter invasion assay on SW480 colon cancer cells. The data are presented as the means  $\pm$  S.D. of three experiments and the  $P$  value are compared with wild-type PRL-3 cells. (B) The ectopic expression of PRL-3 protein, as detected by Western blotting and EGFP antibody.  $\beta$ -actin was used as an internal control.

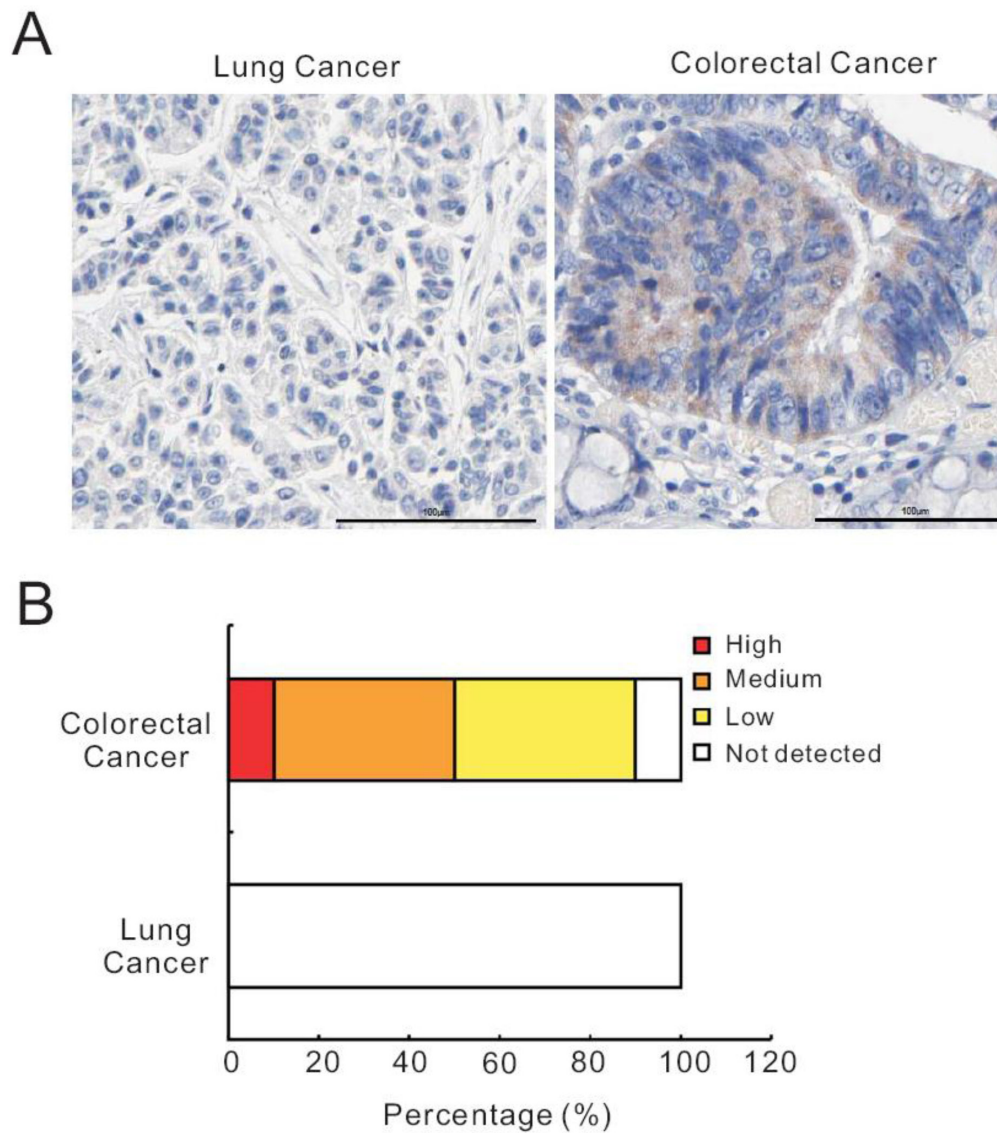

**Supplementary Figure S2: PRL-3 expression in lung and colorectal cancer.** The Human Protein Atlas database ([www.proteinatlas.org](http://www.proteinatlas.org)) was used to determine the protein expression profiles of PRL-3 in human lung and colorectal cancer specimens. **(A)** Protein expression profiles are based on immunohistochemistry of human specimens. **(B)** The color determines the percentage of cancer samples in the database with a given expression level. The numbers of samples for each specimen are as follows: lung cancers (12) and colorectal cancers (10).

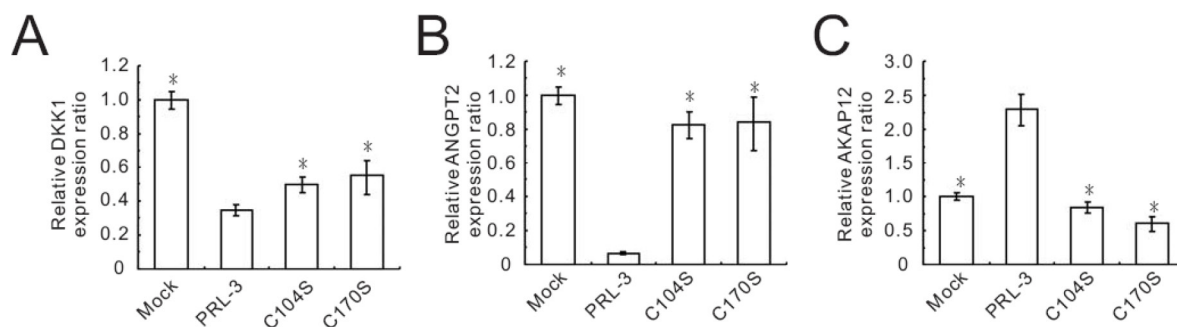

**Supplementary Figure S3: PRL-3 expression regulates tumor-related genes.** **(A)** *DKK1*, **(B)** *ANGPT2* and **(C)** *AKAP12* mRNA expression in wild-type and mutant PRL-3 transfectants, as detected by real-time RT-PCR. Stable CL1-5 transfectants expressing vector alone, wild-type PRL-3, mutant PRL3/C104S, or PRL3/C170S were employed in this study. The data are presented as the mean  $\pm$  S.D. in triplicate. \* $P < 0.05$ , compared with the wild-type PRL-3 cells.
